# Supplementary material for: Effect of perfluoroalkyl exposure in pregnancy and infancy on intrauterine and childhood growth and anthropometry. Sub study from COPSAC2010 birth cohort
Source: PubMed Central journal article supplement (PMC9434040; doi:10.1016/j.ebiom.2022.104236), 2022-08-26
Supplement: mmc1.pdf [file mmc1.pdf]

# 1 ONLINE SUPPLEMENT

2

## 3 METHODS

### 4 Batch normalisation

5 Batch normalisation was performed to compensate for inter-day variation. Specifically, each  
6 metabolite was corrected in run-day blocks by registering the medians to equal one (1.00)  
7 and correcting each variable accordingly. Thereafter, the datasets from all the four platforms  
8 were imported into RStudio (Version 1.1, RStudio, Inc) for statistical analysis. The maternal  
9 and child age 18 months plasma samples were analysed at a later stage compared to the  
10 child age 6 months and 6 years samples. Therefore, we used 20 replicated samples, which  
11 were analysed with the 6 months and 6 years batch (t1) and with the maternal and child age  
12 18 months batch (t2). For each compound we calculated a ratio between t2 and t1 for each  
13 20 replicated sample and the median of the ratios was used as a correction factor for the  
14 maternal and child age 18 months dataset.

15

### 16 Determination of Lactosylceramides

17 Samples were divided in batches of 45 samples, 2 QCext and 1 blank of extraction. For each  
18 batch, samples were thawed at 4°C and vortexed for 20 seconds. Afterwards, a volume of  
19 50 µl of each sample was aliquoted on an Eppendorf tube. Then, 20 µl of an internal  
20 standard mixture, containing d<sub>3</sub>-Lactosylceramide(d18:1/16:0) (Matreya; PN 1534) was  
21 added to each sample. Tubes were then vortexed for 10 seconds and allowed to equilibrate  
22 with the internal standard for 10 minutes at 20°C. Then, a volume of 500 µl of methanol was  
23 added to each sample. Eppendorf tubes were then closed and vortexed for 10 seconds.  
24 Afterwards, samples were sonicated for 15 minutes on an ice bath to avoid the temperature  
25 increasing above 20°C. Samples were then centrifuged at 12000 g for 15 minutes. An aliquot  
26 of 80 µl was finally transferred to an LC-MS vials equipped with a 150 µl insert. To prepare  
27 the QCinj (1 injected every 14 samples), 20 µl of each sample was pooled into a 4 mL glass  
28 vial. All samples and QCs were stored at -20°C until the day of analysis (within 3 days after  
29 extraction). Chromatographic separation was carried out on an ACQUITY UPLC System with  
30 a sample manager cooled to 8°C (both from Waters Corporation, Milford, MA, USA).  
31 Lactosylceramides were separated on a Zorbax Rapid Resolution RRHD C18 Column, 80Å,  
32 1.8 µm, 2.1 mm X 100 mm (Agilent Technologies; Product Number: 758700-902) using a  
33 guard column (Agilent Technologies, PN: 821725-901) (5 × 2 mm, 1.8 µm particle size).

34 Mobiles phases A and B consisted of 5mM ammonium formate (Sigma; PN: 70221) / 0.2%  
35 formic acid (Optima, Fisher-Scientific, PN: 10596814) in water and in methanol (VWR, PN:  
36 34966), respectively. Separation was carried out at a 450 µl/min flow rate and column  
37 temperature was held at 40°C. The following chromatographic gradient was used: 0 min,  
38 75% B; time range 0 → 1 min, 75% B (constant); time range 1 → 5 min, 85 → 100% B  
39 (linear increase); time range 5 to 15.2 min, 100% B (isocratic range); time range 15.2 → 15.3  
40 min, 100 → 75% B (linear decrease); time range 15.3 → 16 min, 75% B (isocratic column  
41 conditioning). Samples were then analysed on a Waters Xevo® TQ-S system equipped with  
42 an Electrospray Ion Source (ESI) and ScanWave™ collision cell technology operating in the  
43 positive mode. A specific single reaction monitoring (SRM) transition for each  
44 lactosylceramide and internal standard was used. For compounds reported with full  
45 quantification, an external calibration curve was built for each compound using external  
46 standards (Avanti Lipids, PN 860545, 860576, 860597, 860577, 860590 and 860598). For  
47 compounds with pseudoquantification, the retention time was predicted based on the  
48 number of carbons and unsaturations, relative to the compounds quantified with a standard.  
49 A pseudo-calibration curve was then built using the closer eluting compound.

#### 50 Land cover and Detection of PFAS in public water systems

51 Birth address of participants was obtained at interviews. Via a public database with all  
52 Danish addresses (<https://dawadocs.dataforsyningen.dk/>), the longitude and latitude were  
53 obtained. These were linked to other publicly available data for land use classification  
54 (<https://land.copernicus.eu/pan-european/corine-land-cover>).

55 Similarly each household address at birth was assigned to the specific waterwork it was  
56 supplied by. PFOS and PFOA in drinking water samples were measured by certified  
57 laboratories and registered in the national monitoring database Jupiter, from which they were  
58 extracted, quality-controlled and collated to “never measured for PFOS/PFOA”, “never  
59 detected above detection limit”; and “at least one sample above detection limit”. For both  
60 PFOS and PFOA, the highest ever amount measured at the respective waterworks was  
61 calculated. Most tests for PFOS and PFOA were done after 2018, so levels at birth were  
62 extrapolated.

63  
64  
65

66 ONLINE TABLES & FIGURES

67 **Figure E1**

68 Maternal (N=675) pregnancy plasma PFOS and PFOA concentrations shown as the mean  
69 of pregnancy week 24 and 1 week postpartum measurement by parity.

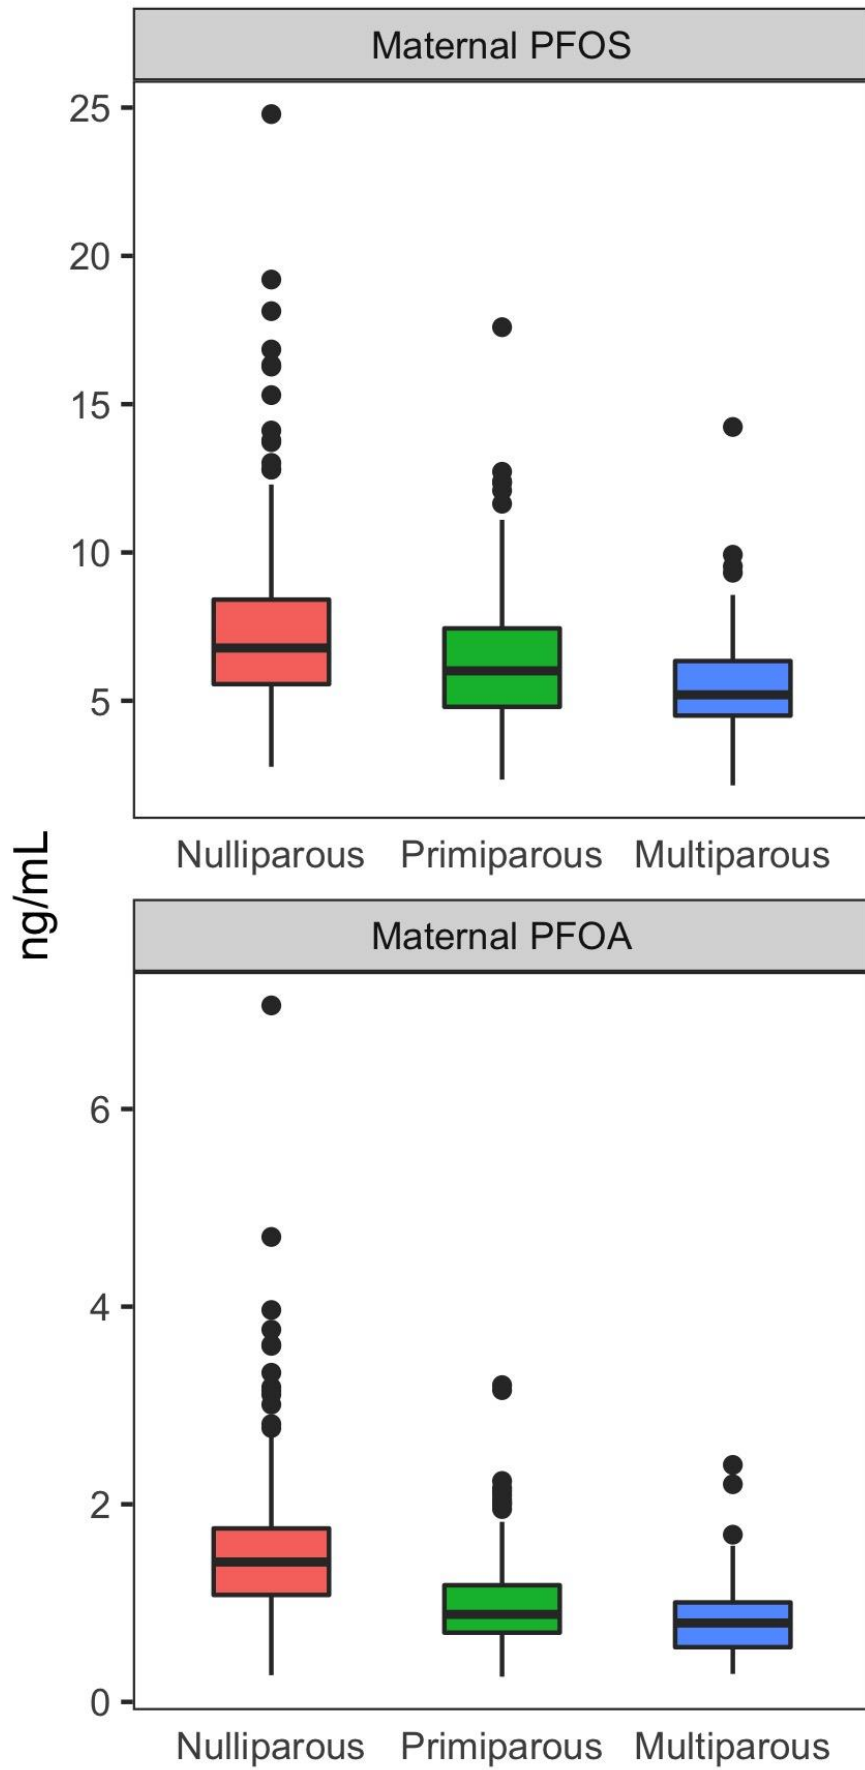



72 **Figure E2**

73 Child (N=521) mean PFOS and PFOA concentrations shown against days of breastfeeding  
74 and maternal concentrations in tertiles. Numbers are offset with 0.8 for PFOA due to  
75 negative extrapolated values from the quantification.

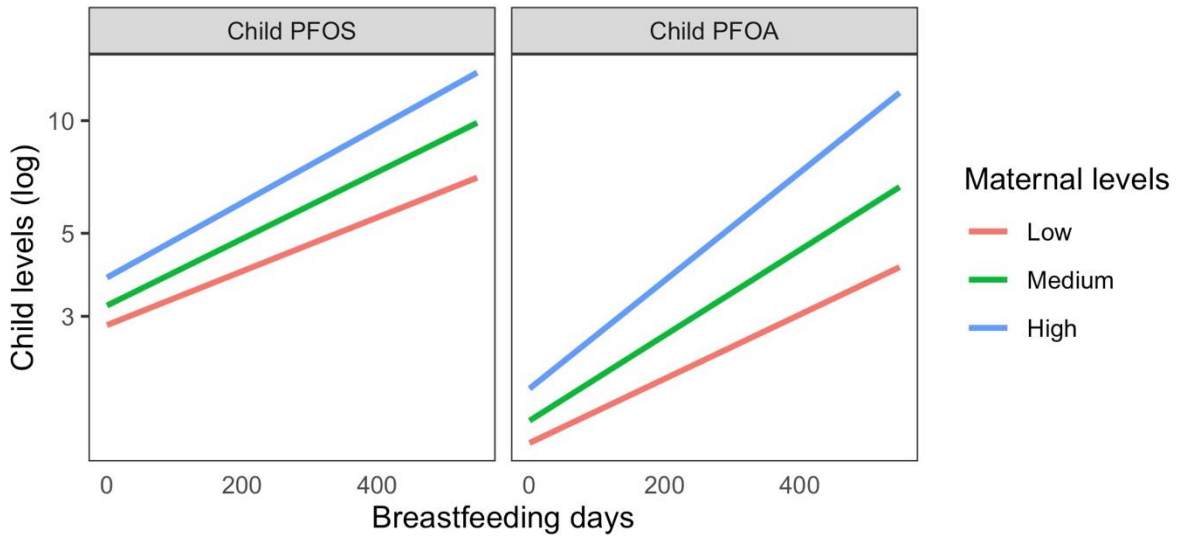

76

77 **Online Table E1.**

78 Associations to maternal concentrations of PFOS and PFOA. Estimates interpreted as  
 79 percentage change in geometric mean, numeric predictors are z-scored, land cover uses  
 80 scaled variable.

|                            | <b>PFOS:<br/>estimate, p (t-<br/>statistic)</b> | <b>PFOA:<br/>estimate, p (t-<br/>statistic)</b> |
|----------------------------|-------------------------------------------------|-------------------------------------------------|
| Maternal age               | -1%, 0.30                                       | -8%, <0.01                                      |
| Maternal BMI               | -1%, 0.47                                       | 2%, 0.20                                        |
| Maternal smoking           | 1%, 0.94                                        | 6%, 0.54                                        |
| Maternal FLG risk*         | -1%, 0.86                                       | 13%, 0.18                                       |
| Fish intake biomarker cmpf | 6%, <0.01                                       | 4%, 0.05                                        |
| Maternal education         | -2%, 0.43                                       | -5%, 0.18                                       |
| Family income              | -1%, 0.56                                       | -3%, 0.03                                       |
| Parity                     | -12%, <0.01                                     | -28%, <0.01                                     |
| Drinking water >LoD        | 14%, 0.50                                       | -4%, 0.39                                       |
| Land cover gradient        | -4%, 0.91                                       | -186%, 0.04                                     |
| Race, european descent     | -13%, 0.03                                      | -7%, 0.44                                       |
| Fishoil intervention group | -1%, 0.62                                       | 4%, 0.24                                        |

81 \*Maternal filaggrin risk is based on SNPs: rs138726443; rs150597413; rs61816761.

82

83

84 **Online Table E2**

85 PFOS and PFOA exposure in pregnancy and estimates for perinatal growth measures. All  
 86 beta estimates (95%CI), p-value represent the effect per 1-ng/mL change in the  
 87 concentration. Estimates are adjusted for parity, ethnicity, fish oil intervention, CMPF  
 88 (biomarker for fish intake), maternal BMI, maternal height, maternal social circumstances  
 89 and urban-rural gradient, **plus adjustment for the other PFAS.**

90  
 91

|                                             | PFOS                     | PFOA                     |
|---------------------------------------------|--------------------------|--------------------------|
| Hadlock w 20. (ultrasound scan)             | 0.55 [-1.77; 2.87] 0.64  | 1.15 [-8.79; 11.10] 0.82 |
| Fetal growth. (birth minus ultrasound scan) | -0.07 [-0.18; 0.05] 0.24 | -0.23 [-0.71; 0.26] 0.36 |
| BMI at birth, z-score                       | -0.03 [-0.06; 0.01] 0.16 | -0.14 [-0.30; 0.02] 0.09 |
| Gestational age at birth, days              | -0.20 [-0.57; 0.18] 0.31 | -0.17 [-1.80; 1.46] 0.83 |
| Weight at birth, z-score                    | -0.03 [-0.07; 0.01] 0.14 | -0.08 [-0.24; 0.08] 0.35 |
| Birth weight % for sex and gestational age  | -0.72 [-1.72; 0.28] 0.16 | -2.79 [-7.13; 1.54] 0.21 |

92  
 93



94 **Online Table E3**  
 95 Multipollutant models.  
 96 Child growth and obesity outcomes by maternal and infancy exposure to PFOS and PFOA.  
 97 All beta estimates (95% CI) p-value represent the effect per 1-ng/mL change in the  
 98 respective compound. All estimates are adjusted for parity, ethnicity, fish oil intervention,  
 99 CMPF (biomarker for fish intake), maternal BMI, maternal height, maternal social  
 100 circumstances and urban-rural gradient, **and the other PFAS**. Effects of infancy exposure is  
 101 further adjusted for breastfeeding duration. Pregnancy exposure is shown as the mean of  
 102 pregnancy week 24 and 1 week postpartum levels and infancy exposure as the mean of 6  
 103 and 18 month levels.  
 104

|                       | <b>Pregnancy</b>           | <b>Infancy</b>             |
|-----------------------|----------------------------|----------------------------|
| <b>PFOS</b>           |                            |                            |
| Adiposity rebound     | 0.03 [-0.02; 0.09] 0.24    | 0.03 [-0.04; 0.10] 0.41    |
| DXA fat %, 6 yr       | 0.00 [-0.04; 0.04] 0.98 *  | 0.00 [-0.04; 0.05] 0.83    |
| BMI z-score 6 yrs     | -0.02 [-0.05; 0.01] 0.26 * | -0.02 [-0.06; 0.01] 0.24   |
| BMI z-score 8 yrs     | -0.02 [-0.05; 0.02] 0.36   | -0.02 [-0.06; 0.03] 0.46   |
| BMI z-score 10 yrs    | -0.03 [-0.08; 0.01] 0.09   | -0.02 [-0.07; 0.02] 0.33   |
| Height z-score 6 yrs  | -0.04 [-0.08; -0.01] 0.01  | -0.07 [-0.11; -0.03] <0.01 |
| Height z-score 8 yrs  | -0.05 [-0.08; -0.01] <0.01 | -0.07 [-0.11; -0.03] <0.01 |
| Height z-score 10 yrs | -0.05 [-0.09; -0.02] <0.01 | -0.06 [-0.11; -0.02] <0.01 |
| BCA 10 yr FFMI        | -0.05 [-0.10; -0.01] 0.02  | -0.05 [-0.11; 0.00] 0.06   |
| BCA 10 yr FMI         | -0.02 [-0.08; 0.03] 0.38   | 0.01 [-0.06; 0.07] 0.82    |
| <b>PFOA</b>           |                            |                            |
| Adiposity rebound     | -0.26 [-0.50; -0.02] 0.03  | -0.01 [-0.11; 0.09] 0.83   |
| DXA fat %, 6 yr       | 0.14 [-0.03; 0.31] 0.12    | 0.01 [-0.06; 0.08] 0.79    |
| BMI z-score 6 yrs     | 0.02 [-0.12; 0.15] 0.82    | -0.01 [-0.07; 0.04] 0.60   |
| BMI z-score 8 yrs     | 0.08 [-0.07; 0.23] 0.31    | 0.01 [-0.05; 0.07] 0.82    |
| BMI z-score 10 yrs    | 0.18 [0.00; 0.36] 0.05     | 0.01 [-0.06; 0.08] 0.81    |
| Height z-score 6 yrs  | 0.25 [0.11; 0.40] <0.01    | 0.02 [-0.04; 0.07] 0.59    |
| Height z-score 8 yrs  | 0.26 [0.12; 0.41] <0.01    | 0.02 [-0.04; 0.08] 0.54    |
| Height z-score 10 yrs | 0.31 [0.15; 0.47] <0.01    | 0.03 [-0.03; 0.10] 0.30    |
| BCA 10 yr FFMI        | 0.11 [-0.09; 0.32] 0.28    | 0.03 [-0.05; 0.11] 0.45    |
| BCA 10 yr FMI         | 0.23 [0.00; 0.46] 0.05     | 0.01 [-0.09; 0.10] 0.87    |

105  
 106

107 **Online Table E4.**

108 Sex stratified growth outcomes. All beta estimates (95% CI, and t-statistic p-values)  
 109 represent the effect per 1-ng/mL change in the respective compound. All estimates are  
 110 adjusted for parity, ethnicity, fish oil intervention, CMPF (biomarker for fish intake), maternal  
 111 BMI, maternal social circumstances and urban-rural gradient. Infancy additionally adjusted  
 112 for breastfeeding duration. Columns with multipollutant models further adjust for  
 113 concentration of the other compound. Pregnancy exposure is shown as the mean of  
 114 pregnancy week 24 and 1 week postpartum levels and infancy exposure as the mean of 6  
 115 and 18 month levels.

116

|                      | Pregnancy                  | Pregnancy, multipollutant   | Infancy                     | Infancy, multipollutant    |
|----------------------|----------------------------|-----------------------------|-----------------------------|----------------------------|
| <b>Females: PFOS</b> |                            |                             |                             |                            |
| Adiposity rebound    | 0.01 [-0.07; 0.09] 0.83    | 0.04 [-0.05; 0.13] 0.35     | -0.04 [-0.15; 0.06] 0.39    | -0.05 [-0.17; 0.06] 0.37   |
| DXA fat %, 6 yr      | -0.04 [-0.09; 0] 0.07      | -0.07 [-0.12; -0.02] 0.0063 | -0.05 [-0.11; 0.01] 0.079   | -0.06 [-0.12; 0] 0.057     |
| BMI z 6 yrs          | -0.06 [-0.1; -0.02] 0.0068 | -0.06 [-0.11; -0.01] 0.012  | -0.03 [-0.08; 0.02] 0.18    | -0.03 [-0.09; 0.02] 0.25   |
| BMI z 8 yrs          | -0.04 [-0.09; 0.01] 0.12   | -0.05 [-0.1; 0] 0.060       | -0.01 [-0.07; 0.05] 0.77    | -0.01 [-0.08; 0.06] 0.75   |
| BMI z 10 yrs         | -0.04 [-0.1; 0.02] 0.16    | -0.06 [-0.12; 0] 0.070      | -0.01 [-0.08; 0.06] 0.76    | -0.01 [-0.09; 0.07] 0.84   |
| Height z 6 yrs       | -0.04 [-0.08; 0.01] 0.14   | -0.05 [-0.11; 0] 0.044      | -0.07 [-0.13; -0.01] 0.019  | -0.08 [-0.14; -0.01] 0.027 |
| Height z 8 yrs       | -0.05 [-0.1; 0] 0.05       | -0.07 [-0.12; -0.02] 0.011  | -0.09 [-0.15; -0.03] 0.0059 | -0.09 [-0.16; -0.02] 0.013 |
| Height z 10 yrs      | -0.05 [-0.11; 0.01] 0.09   | -0.07 [-0.14; -0.01] 0.024  | -0.08 [-0.15; -0.01] 0.036  | -0.08 [-0.16; 0] 0.059     |
| BCA 10 yr FFMI       | -0.07 [-0.14; -0.01] 0.031 | -0.08 [-0.16; -0.01] 0.025  | -0.01 [-0.09; 0.07] 0.78    | -0.01 [-0.1; 0.08] 0.76    |
| BCA 10 yr FMI        | -0.06 [-0.13; 0.02] 0.13   | -0.09 [-0.17; -0.01] 0.029  | 0 [-0.09; 0.09] 0.99        | 0 [-0.11; 0.1] 0.96        |
| <b>Males: PFOS</b>   |                            |                             |                             |                            |
| Adiposity rebound    | 0.01 [-0.05; 0.07] 0.65    | 0.03 [-0.04; 0.1] 0.40      | 0.06 [-0.01; 0.13] 0.073    | 0.08 [0; 0.16] 0.050       |
| DXA fat %, 6 yr      | 0.06 [0.02; 0.1] 0.0047    | 0.06 [0.01; 0.11] 0.011     | 0.03 [-0.01; 0.08] 0.17     | 0.04 [-0.01; 0.1] 0.11     |
| BMI z 6 yrs          | 0.02 [-0.02; 0.05] 0.41    | 0.01 [-0.03; 0.06] 0.56     | -0.01 [-0.06; 0.03] 0.50    | -0.01 [-0.06; 0.04] 0.72   |
| BMI z 8 yrs          | 0.01 [-0.03; 0.05] 0.63    | 0.01 [-0.04; 0.06] 0.75     | -0.01 [-0.06; 0.04] 0.65    | -0.02 [-0.07; 0.04] 0.52   |
| BMI z 10 yrs         | 0 [-0.04; 0.05] 0.89       | -0.02 [-0.07; 0.04] 0.55    | -0.01 [-0.07; 0.04] 0.63    | -0.03 [-0.09; 0.03] 0.40   |
| Height z 6 yrs       | 0 [-0.04; 0.05] 0.84       | -0.03 [-0.08; 0.02] 0.28    | -0.05 [-0.11; 0] 0.048      | -0.05 [-0.11; 0.01] 0.11   |
| Height z 8 yrs       | 0.01 [-0.04; 0.06] 0.72    | -0.02 [-0.08; 0.03] 0.44    | -0.05 [-0.1; 0.01] 0.090    | -0.05 [-0.11; 0.02] 0.15   |
| Height z 10 yrs      | 0 [-0.04; 0.05] 0.91       | -0.03 [-0.09; 0.02] 0.27    | -0.04 [-0.09; 0.01] 0.16    | -0.04 [-0.11; 0.02] 0.16   |
| BCA 10 yr FFMI       | -0.01 [-0.06; 0.04] 0.67   | -0.02 [-0.08; 0.04] 0.51    | -0.03 [-0.08; 0.03] 0.32    | -0.05 [-0.11; 0.01] 0.13   |
| BCA 10 yr FMI        | 0.04 [-0.02; 0.1] 0.19     | 0.03 [-0.04; 0.1] 0.44      | 0.01 [-0.05; 0.08] 0.71     | 0.01 [-0.07; 0.09] 0.80    |
|                      |                            |                             |                             |                            |

| <b>Females: PFOA</b> |                          |                           |                          |                          |
|----------------------|--------------------------|---------------------------|--------------------------|--------------------------|
| Adiposity rebound    | -0.25 [-0.57; 0.06] 0.11 | -0.31 [-0.65; 0.03] 0.072 | -0.01 [-0.15; 0.13] 0.88 | 0.02 [-0.13; 0.18] 0.78  |
| DXA fat %, 6 yr      | 0.14 [-0.04; 0.32] 0.13  | 0.22 [0.03; 0.42] 0.022   | 0 [-0.08; 0.08] 0.94     | 0.03 [-0.05; 0.12] 0.46  |
| BMI z 6 yrs          | -0.08 [-0.25; 0.08] 0.34 | 0 [-0.18; 0.17] 0.99      | -0.02 [-0.09; 0.04] 0.48 | 0 [-0.08; 0.07] 0.91     |
| BMI z 8 yrs          | 0.04 [-0.14; 0.23] 0.64  | 0.11 [-0.09; 0.31] 0.27   | 0 [-0.08; 0.08] 0.99     | 0.01 [-0.08; 0.1] 0.89   |
| BMI z 10 yrs         | 0.08 [-0.14; 0.3] 0.46   | 0.15 [-0.08; 0.39] 0.20   | -0.01 [-0.11; 0.08] 0.78 | -0.01 [-0.12; 0.1] 0.87  |
| Height z 6 yrs       | 0.08 [-0.1; 0.27] 0.39   | 0.15 [-0.05; 0.35] 0.14   | -0.03 [-0.12; 0.05] 0.42 | 0.01 [-0.08; 0.1] 0.79   |
| Height z 8 yrs       | 0.09 [-0.1; 0.29] 0.35   | 0.19 [-0.02; 0.39] 0.076  | -0.05 [-0.14; 0.03] 0.24 | 0 [-0.1; 0.09] 0.99      |
| Height z 10 yrs      | 0.11 [-0.11; 0.34] 0.33  | 0.2 [-0.04; 0.44] 0.098   | -0.05 [-0.15; 0.05] 0.36 | 0 [-0.11; 0.11] 0.98     |
| BCA 10 yr FFMI       | 0 [-0.27; 0.26] 0.99     | 0.11 [-0.17; 0.39] 0.45   | 0 [-0.12; 0.12] 0.99     | 0.01 [-0.12; 0.14] 0.90  |
| BCA 10 yr FMI        | 0.17 [-0.12; 0.46] 0.25  | 0.28 [-0.03; 0.58] 0.076  | 0.01 [-0.12; 0.14] 0.91  | 0.01 [-0.14; 0.16] 0.90  |
| <b>Males: PFOA</b>   |                          |                           |                          |                          |
| Adiposity rebound    | -0.07 [-0.35; 0.22] 0.65 | -0.18 [-0.52; 0.16] 0.30  | 0.01 [-0.1; 0.11] 0.87   | -0.05 [-0.17; 0.07] 0.42 |
| DXA fat %, 6 yr      | 0.13 [-0.07; 0.33] 0.20  | -0.01 [-0.25; 0.23] 0.95  | 0 [-0.07; 0.07] 0.95     | -0.04 [-0.12; 0.04] 0.38 |
| BMI z 6 yrs          | 0.06 [-0.12; 0.23] 0.54  | 0.04 [-0.17; 0.25] 0.71   | -0.03 [-0.09; 0.04] 0.44 | -0.02 [-0.09; 0.05] 0.60 |
| BMI z 8 yrs          | 0.04 [-0.16; 0.25] 0.69  | 0.04 [-0.2; 0.28] 0.73    | 0.01 [-0.06; 0.08] 0.83  | 0.02 [-0.06; 0.1] 0.62   |
| BMI z 10 yrs         | 0.14 [-0.09; 0.37] 0.24  | 0.2 [-0.07; 0.47] 0.15    | 0.02 [-0.06; 0.1] 0.62   | 0.04 [-0.05; 0.13] 0.40  |
| Height z 6 yrs       | 0.23 [0.01; 0.45] 0.042  | 0.31 [0.05; 0.57] 0.019   | -0.05 [-0.13; 0.03] 0.24 | -0.01 [-0.11; 0.08] 0.75 |
| Height z 8 yrs       | 0.22 [-0.01; 0.45] 0.057 | 0.29 [0.02; 0.56] 0.036   | -0.04 [-0.12; 0.05] 0.39 | 0 [-0.1; 0.09] 0.96      |
| Height z 10 yrs      | 0.22 [0; 0.45] 0.055     | 0.31 [0.04; 0.58] 0.023   | -0.02 [-0.1; 0.06] 0.69  | 0.02 [-0.08; 0.11] 0.72  |
| BCA 10 yr FFMI       | 0.03 [-0.21; 0.26] 0.83  | 0.09 [-0.2; 0.37] 0.55    | 0.02 [-0.06; 0.11] 0.57  | 0.06 [-0.03; 0.16] 0.20  |
| BCA 10 yr FMI        | 0.18 [-0.1; 0.46] 0.21   | 0.14 [-0.2; 0.48] 0.42    | 0.02 [-0.08; 0.11] 0.76  | 0.01 [-0.11; 0.12] 0.90  |

117

118

119 **Online Table E5.**

120 Relationship between maternal PFOS and 6 years plasma LacCers. Estimates are adjusted  
 121 for parity, ethnicity, fish oil intervention, CMPF (biomarker for fish intake), maternal BMI,  
 122 maternal social circumstances, urban-rural gradient and breast feeding.

123

|                     | Estimate | 95% CI          | P.value |
|---------------------|----------|-----------------|---------|
| LacCer(d18:1/24:1)  | 430.8    | [177.79 683.81] | 0.001   |
| LacCer(d18:1/16:0)  | 1189.7   | [440.2 1939.14] | 0.002   |
| LacCer(d18:1/18:1)  | 13.4     | [4.47 22.41]    | 0.003   |
| *LacCer(d18:1/22:0) | 89.1     | [28.67 149.59]  | 0.004   |
| LacCer(d18:1/18:0)  | 17.1     | [4.39 29.74]    | 0.008   |
| *LacCer(d18:1/20:0) | 8.3      | [1.63 15.02]    | 0.015   |
| LacCer(d18:1/24:0)  | 67.0     | [12.15 121.84]  | 0.017   |
| LacCer(d18:1/17:0)  | 24.0     | [0.91 47.17]    | 0.042   |
| *LacCer(d18:1/14:0) | 14.3     | [-11.39 40]     | 0.275   |
| *LacCer(d18:1/12:0) | 1.1      | [-3.32 5.57]    | 0.619   |

124

125 \*indicates that the LacCer species was pseudo-quantified

126

127
